# Supplementary material for: Conductive two-dimensional M3(C6S3O3)2 monolayers as effective electrocatalysts for the oxygen reduction reaction
Source: Royal Society of Chemistry journal article supplement (doi:10.1039/d1ta07442c), 2021-01-01
Supplement: d1ta07442c1.pdf [file d1ta07442c1.pdf]

Supporting information

## Conductive two-dimensional $M_3(C_6S_3O_3)_2$ monolayers as efficient electrocatalysts for oxygen reduction reaction

Tianchun Li,<sup>†</sup> Manman Li,<sup>†</sup> Xinyue Zhu,<sup>†</sup> Juan Zhang,<sup>†</sup> Yu Jing<sup>†\*</sup>

<sup>†</sup>Jiangsu Co-Innovation Centre of Efficient Processing and Utilization of Forest Resources, International Innovation Center for Forest Chemicals and Materials, College of Chemical Engineering, Nanjing Forestry University, Nanjing 210037, China

To whom correspondence should be addressed. Email: [yujing@njfu.edu.cn](mailto:yujing@njfu.edu.cn)(YJ)

**Table S1** Lattice parameter, pore size and formation energy ( $E_f$ ) of each  $M_3(C_6S_3O_3)_2$  monolayer.

| M           | Co     | Cr     | Cu    | Fe     | Mn     | Ni     | Pd    | Rh     | Ru     |
|-------------|--------|--------|-------|--------|--------|--------|-------|--------|--------|
| Lattice (Å) | 13.64  | 14.05  | 13.77 | 13.79  | 13.90  | 13.60  | 14.05 | 14.10  | 14.22  |
| Dp (Å)      | 10.57  | 10.87  | 10.69 | 10.70  | 10.73  | 10.52  | 10.96 | 11.06  | 11.16  |
| Dm (Å)      | 6.82   | 7.03   | 6.89  | 6.90   | 6.95   | 6.80   | 7.03  | 7.05   | 7.11   |
| $E_f$ (eV)  | -14.22 | -12.06 | -6.11 | -12.70 | -12.41 | -13.47 | -8.24 | -14.21 | -18.20 |

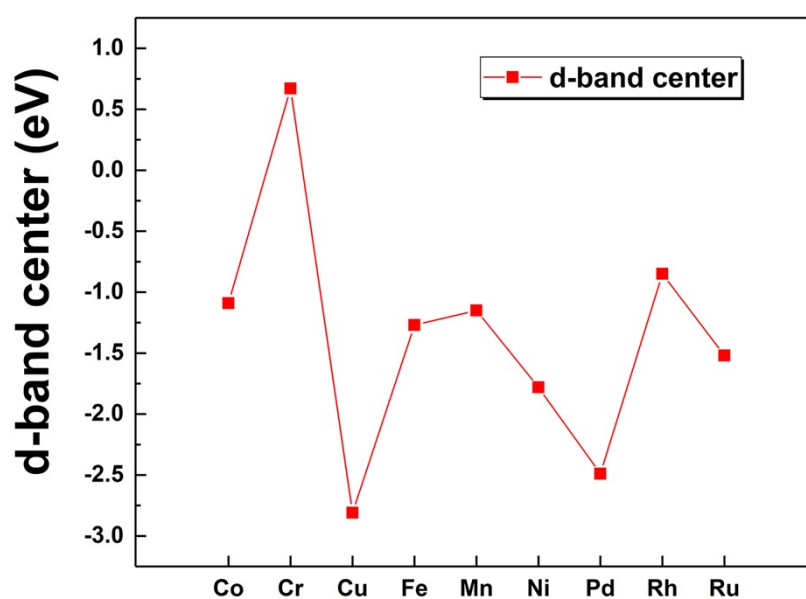

**Fig. S1** The value of d-band center ( $\epsilon_d$ ) of transition metals of different  $M_3(C_6S_3O_3)_2$  monolayers.

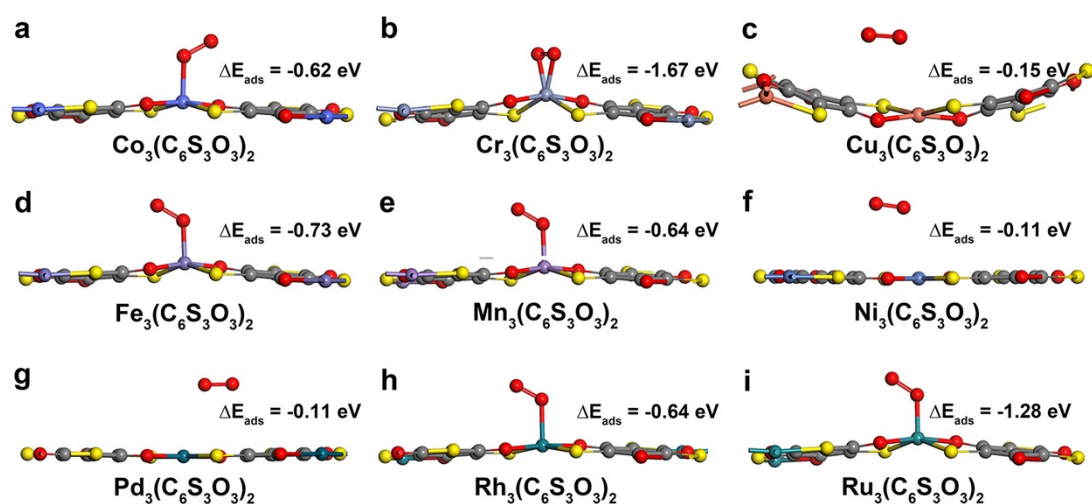

**Fig. S2** Schematics of O<sub>2</sub> adsorption on M<sub>3</sub>(C<sub>6</sub>S<sub>3</sub>O<sub>3</sub>)<sub>2</sub> monolayers.

**Table S2** Gibbs free energy change ( $\Delta G$ ) of each elementary step for ORR on M<sub>3</sub>(C<sub>6</sub>S<sub>3</sub>O<sub>3</sub>)<sub>2</sub> monolayers

| M=                | Co    | Cr    | Cu    | Fe    | Mn    | Ni    | Pd    | Rh    | Ru    |
|-------------------|-------|-------|-------|-------|-------|-------|-------|-------|-------|
| $\Delta G_1$ (eV) | -0.79 | -1.66 | 0.05  | -0.94 | -1.00 | 0.09  | 0.24  | -0.81 | -1.80 |
| $\Delta G_2$ (eV) | -1.78 | -3.12 | -3.20 | -2.23 | -2.43 | -3.12 | -0.76 | -1.67 | -2.63 |
| $\Delta G_3$ (eV) | -1.34 | -0.30 | -0.58 | -1.04 | -0.79 | -0.62 | -2.19 | -1.48 | -0.46 |
| $\Delta G_4$ (eV) | -1.00 | -0.16 | -1.19 | -0.71 | -0.70 | -1.27 | -2.21 | -0.96 | -0.03 |

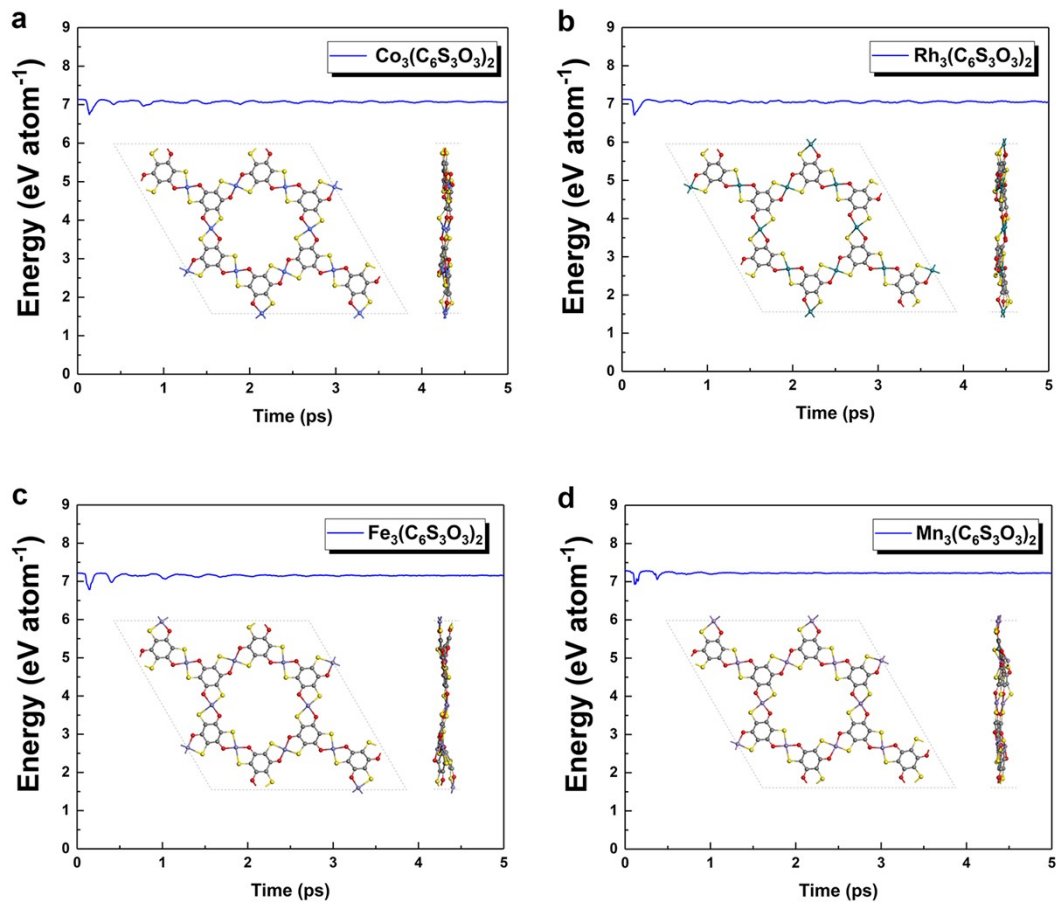

**Fig. S3** The change of total energy with time for (a)  $\text{Co}_3(\text{C}_6\text{S}_3\text{O}_3)_2$ , (b)  $\text{Rh}_3(\text{C}_6\text{S}_3\text{O}_3)_2$ , (c)  $\text{Fe}_3(\text{C}_6\text{S}_3\text{O}_3)_2$ , and (d)  $\text{Mn}_3(\text{C}_6\text{S}_3\text{O}_3)_2$  monolayer by *ab initio* molecular dynamic (AIMD) simulations at 500 K for 5 ps. Inside are top and side views of  $\text{Co}_3(\text{C}_6\text{S}_3\text{O}_3)_2$ ,  $\text{Rh}_3(\text{C}_6\text{S}_3\text{O}_3)_2$ ,  $\text{Fe}_3(\text{C}_6\text{S}_3\text{O}_3)_2$ , and  $\text{Mn}_3(\text{C}_6\text{S}_3\text{O}_3)_2$  monolayer at  $T=500$  K after 5 ps.

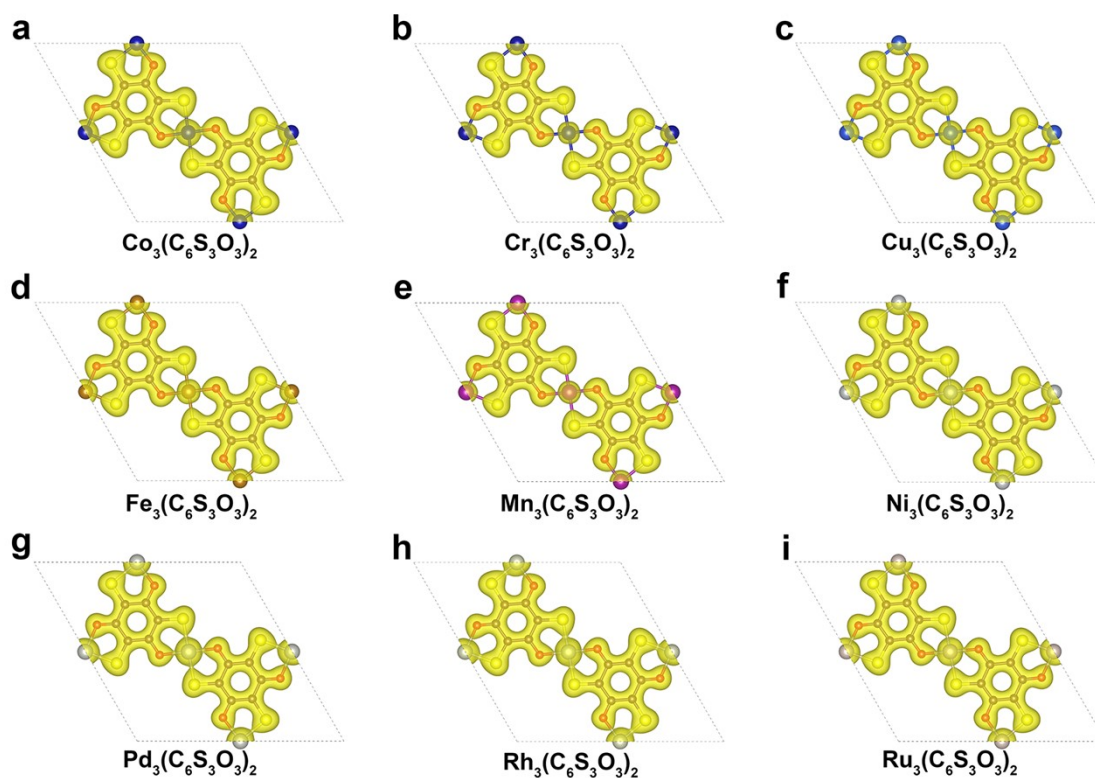

**Fig. S4** The charge density distribution of  $M_3(C_6S_3O_3)_2$  monolayer. The isosurface value is set to be  $0.1 e/\text{Bohr}^3$ .

**Table S3** Charge ( $|e|$ ) transferred between central metal atoms and surrounding oxygen and sulfur atoms of the  $MS_2O_2$  moieties.

|                     | M     | O    | S     |
|---------------------|-------|------|-------|
| $Co_3(C_6S_3O_3)_2$ | -0.86 | 1.00 | -0.04 |
| $Cr_3(C_6S_3O_3)_2$ | -1.26 | 1.04 | 0.13  |
| $Cu_3(C_6S_3O_3)_2$ | -0.81 | 1.01 | -0.04 |
| $Fe_3(C_6S_3O_3)_2$ | -1.08 | 1.01 | 0.06  |
| $Mn_3(C_6S_3O_3)_2$ | -1.28 | 1.04 | 0.11  |
| $Ni_3(C_6S_3O_3)_2$ | -0.77 | 0.98 | -0.06 |
| $Pd_3(C_6S_3O_3)_2$ | -0.63 | 0.96 | -0.10 |
| $Rh_3(C_6S_3O_3)_2$ | -0.63 | 0.96 | -0.10 |
| $Ru_3(C_6S_3O_3)_2$ | -0.95 | 0.98 | 0.02  |

### Details of microkinetics simulations

The polarization curve of the  $M_3(C_6S_3O_3)_2$  monolayers was simulated based on a general kinetic model applicable to ORR.<sup>1</sup> The  $O_2$  adsorption (non-electrochemical step) and electrochemical steps are listed below:

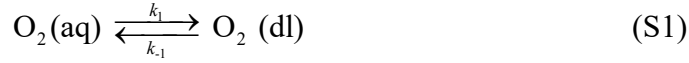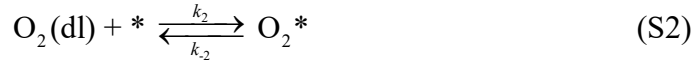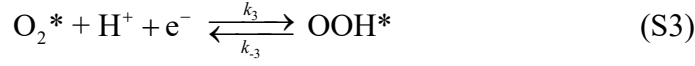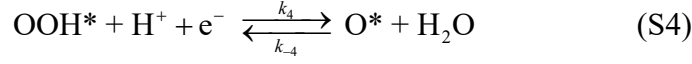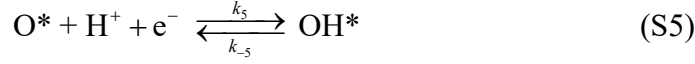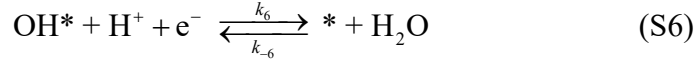

where  $k_i$  and  $k_{-i}$  denote the forward and reverse reaction rate constant, respectively.  $O_2(\text{aq})$  and  $O_2(\text{dl})$  refer to the  $O_2$  in the electrolyte and catalyst-electrolyte interfaces, respectively.

According to the above elementary steps, the rate equation for each species can be expressed as:

$$\frac{\partial x_{O_2(\text{dl})}}{\partial t} = k_1 x_{O_2(\text{aq})} - k_{-1} x_{O_2(\text{dl})} - k_2 x_{O_2(\text{dl})} \theta^* + k_{-2} \theta_{O_2^*} \quad (\text{S7})$$

$$\frac{\partial x_{O_2^*}}{\partial t} = k_2 x_{O_2(\text{dl})} \theta^* - k_{-2} x_{O_2^*} - k_3 \theta_{O_2^*} + k_{-3} \theta_{OOH^*} \quad (\text{S8})$$

$$\frac{\partial x_{OOH^*}}{\partial t} = k_3 \theta_{O_2^*} - k_{-3} \theta_{OOH^*} - k_4 \theta_{OOH^*} + k_{-4} \theta_{O^*} \quad (\text{S9})$$

$$\frac{\partial x_{O^*}}{\partial t} = k_4 \theta_{OOH^*} - k_{-4} \theta_{O^*} - k_5 \theta_{O^*} + k_{-5} \theta_{OH^*} \quad (\text{S10})$$

$$\frac{\partial x_{OH^*}}{\partial t} = k_5 \theta_{O^*} - k_{-5} \theta_{OH^*} - k_6 \theta_{OH^*} + k_{-6} \theta^* \quad (\text{S11})$$

where  $x$ ,  $\theta$  and  $t$  refer to molar fraction, coverage of the species and time, respectively.  $x_{H_2O}$  is taken as 1 and  $x_{O_2(\text{aq})}$  is taken as a value of  $2.34 \times 10^{-5}$ , denoting  $O_2(\text{g})$  at equilibrium with  $O_2(\text{aq})$  at 1 atm.

For the non-electrochemical step  $i$ , the equilibrium constant ( $K_i$ ) and  $k_i$  can be expressed as:

$$K_i = \exp\left(-\frac{\Delta G_i}{k_B T}\right) \quad (\text{S12})$$

$$k_i = v_i \exp\left(-\frac{E_{a,i}}{k_B T}\right) \quad (\text{S13})$$

where  $\Delta G_i$  is the free energy change of step i,  $v_i$  is the pre-exponential factor and  $E_{a,i}$  is the activation energy. In addition,  $k_B$  is the Boltzmann constant and T is the temperature taken as 298.15K.

$K_i$  and  $k_i$  for electrochemical step i, which is associated with both the electrode potential( $U$ ), can be calculated with the following equations:

$$K_i = \exp\left(-\frac{e(U-U_i)}{k_B T}\right) \quad (\text{S14})$$

$$k_i = A_i \exp\left(-\frac{E_{a,i}}{k_B T}\right) \exp\left(-\frac{e\beta_i(U-U_i)}{k_B T}\right) \quad (\text{S15})$$

where  $U_i$  is the reversible potential of step i derived from  $U_i = -\Delta G_i / e$ ,  $A_i$  refers to the effective pre-exponential factor with a value of  $1.23 \times 10^9$ , and  $\beta_i$  denotes the symmetric factor taken as 0.5.

Since the  $E_{a,i}$  values of electrochemical steps of the ORR are usually small, in the range from 0.10 to 0.26eV,<sup>2</sup>  $E_{a,i} = 0.26\text{eV}$  was employed for all the electrochemical steps of the ORR on the  $\text{M}_3(\text{C}_6\text{S}_3\text{O}_3)_2$  monolayers.

Furthermore, for all the reverse reactions, the rate constants ( $k_{-i}$ ) can be derived from the following equation:

$$k_{-i} = \frac{k_i}{K_i} \quad (\text{S16})$$

Finally, the current density( $j$ ) can be calculated according to the following equation:

$$j = e\rho TOF_e \quad (\text{S17})$$

---

1 H. A. Hansen, V. Viswanathan and J. K. Nørskov, *J. Phys. Chem. C*, 2014, **118**, 6706-6718.

2 V. Tripković, E. Skúlason, S. Siahrostami, J. K. Nørskov and J. Rossmeisl, *Electrochim. Acta*, 2010, **55**, 7975-7981.
